# Supplementary material
Source: PubMed Central journal article supplement (PMC7831855)
Supplement: mmc1.pdf [file mmc1.pdf]

# THE LANCET

## Gastroenterology & Hepatology

### Supplementary appendix

This appendix formed part of the original submission. We post it as supplied by the authors.

Supplement to: Tavabie OD, Abeysekera KWM, Tranah TH, Nayagam JS, Aluvihare VR. COVID-19 and liver transplantation: the jury is still out. *Lancet Gastroenterol Hepatol* 2020; published online Oct 30. [https://doi.org/10.1016/S2468-1253\(20\)30313-7](https://doi.org/10.1016/S2468-1253(20)30313-7).

| LTx stage  | Variables                                                                                                                                                         |
|------------|-------------------------------------------------------------------------------------------------------------------------------------------------------------------|
| Pre-LTx    | Predominant aetiology of liver disease, access to LTx assessment (private healthcare or state sponsored), LTx assessment process                                  |
| Procedural | Graft selection (DBD v DCD v LDLT, HCV and HBcAb positive grafts) and/or allocation, surgical approach and techniques                                             |
| Post-Ltx   | Immunosuppression regimens including target trough titres and preparations, co-morbidity management and screening (e.g. hypertension, diabetes and renal failure) |

**Table 1. Potential variables which may differ between LTx centres nationally and internationally<sup>1,2</sup>.** Abbreviations:- donation after brain death (DBD), donation after cardiac death (DCD), living donor liver transplant (LDLT), hepatitis C (HCV), Hepatitis B core antibody (HBcAb)

## REFERENCES

1. Carbone M, Nardi A, Marianelli T, *et al*. International comparison of liver transplant programmes: differences in indications, donor and recipient selection and outcome between Italy and the UK. *Liver International*. 2016;36:1481-1489
2. Trotter JF and Cardenas A. Liver transplantation around the world. *Liver Transplantation*. 2016;22:1059-1061
